# Supplementary figures and images for: Spitzer mid-infrared detections of neutron star merger GW170817 suggests synthesis of the heaviest elements
Source: Oxford University Press journal article supplement (doi:10.1093/mnrasl/slz007), 2019-01-14

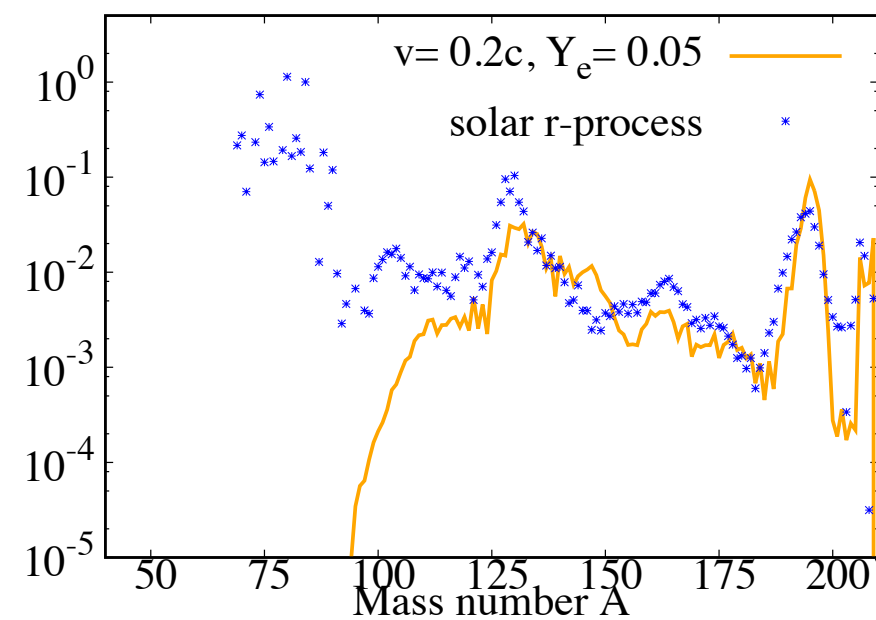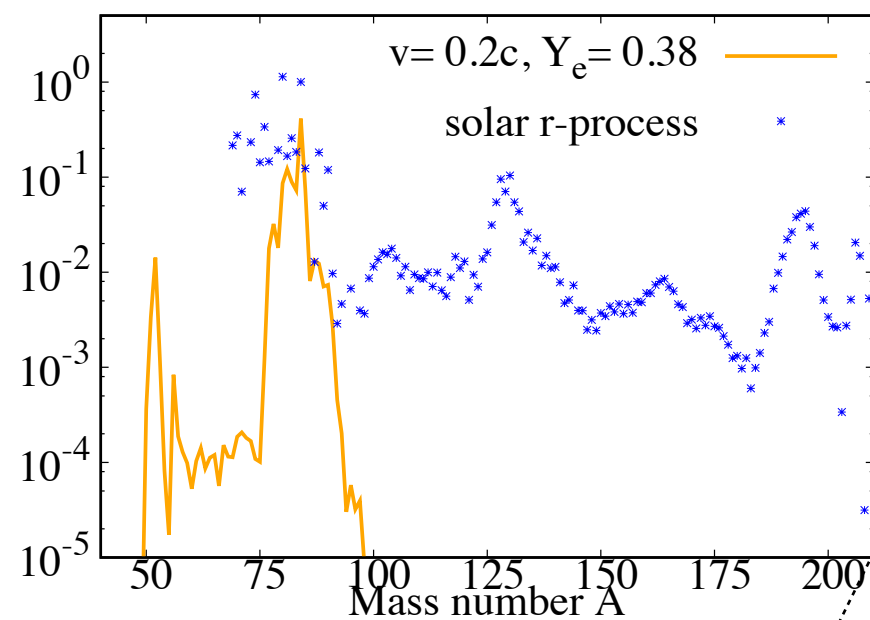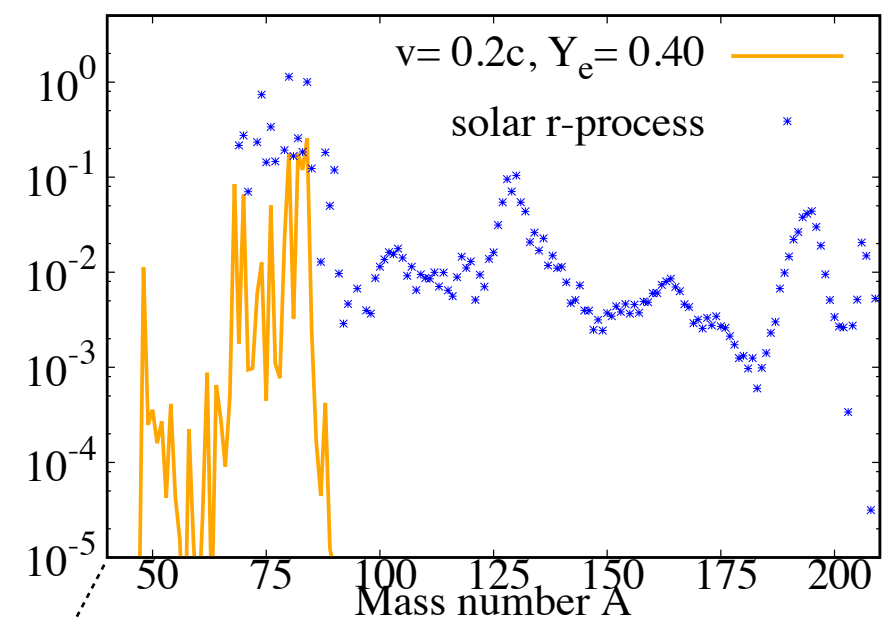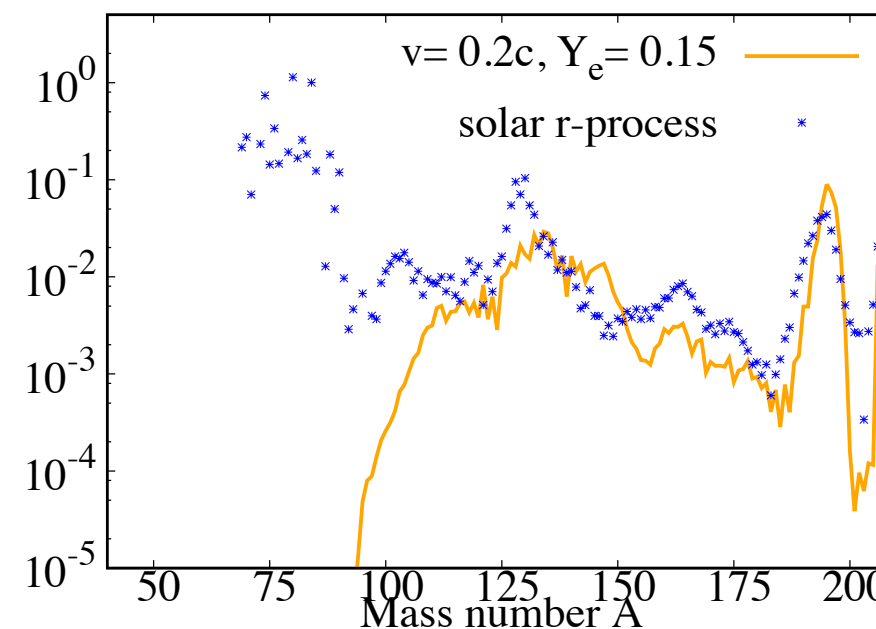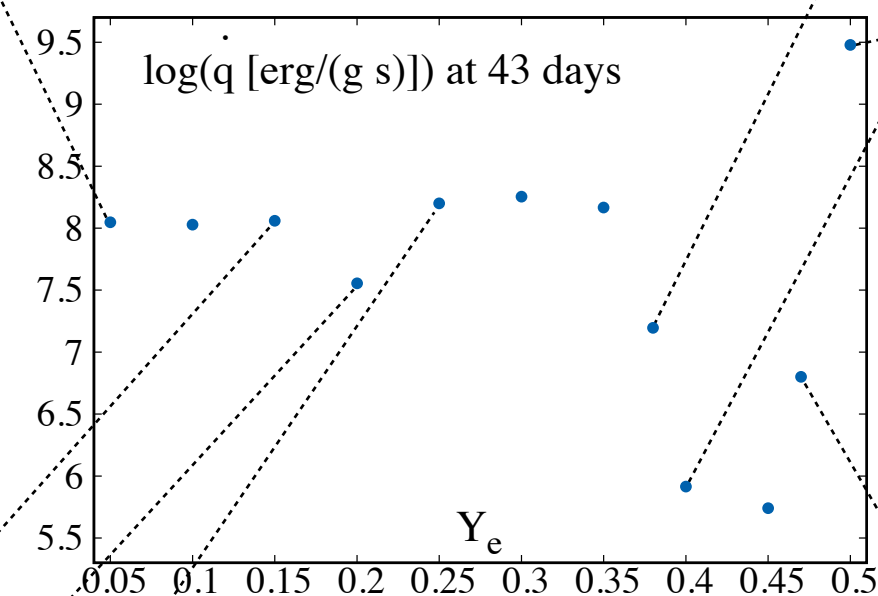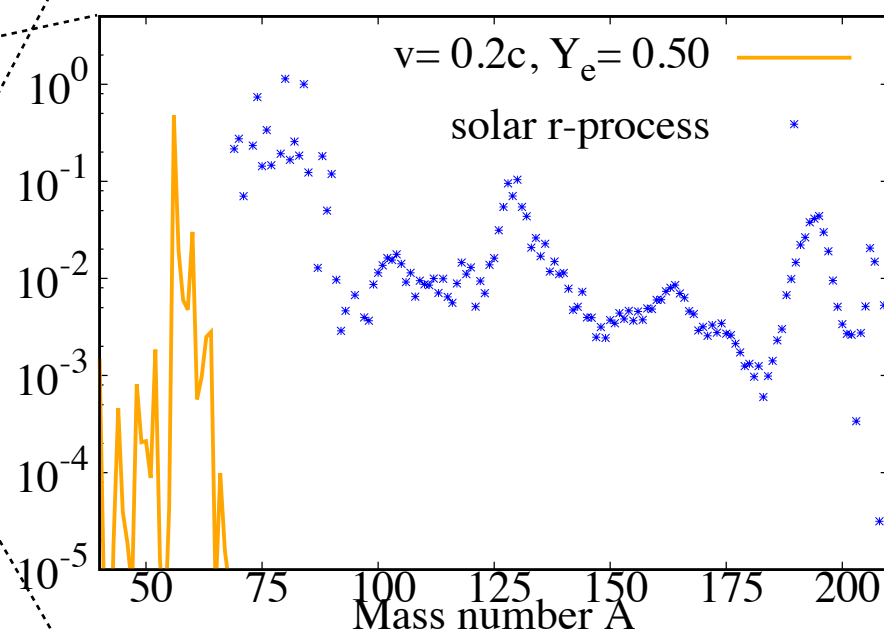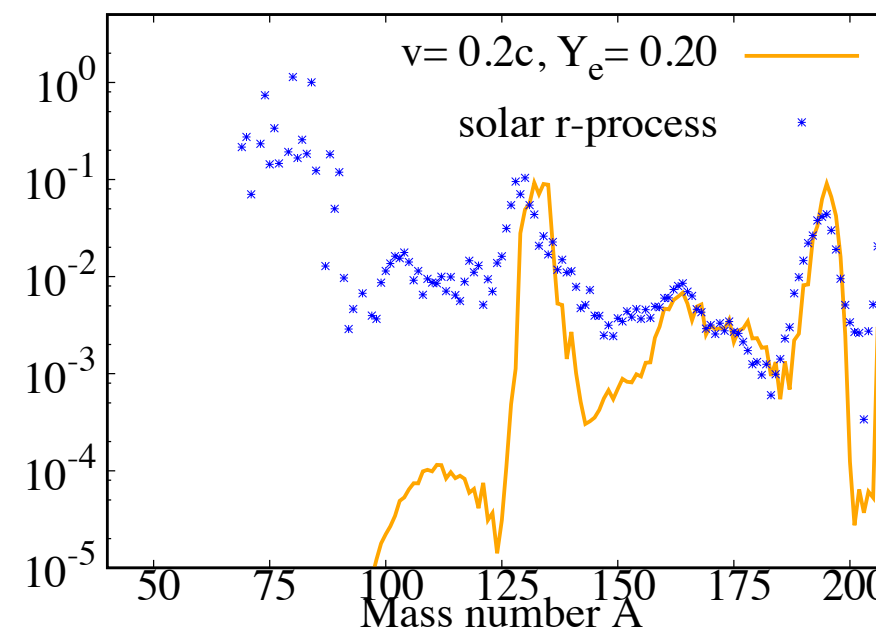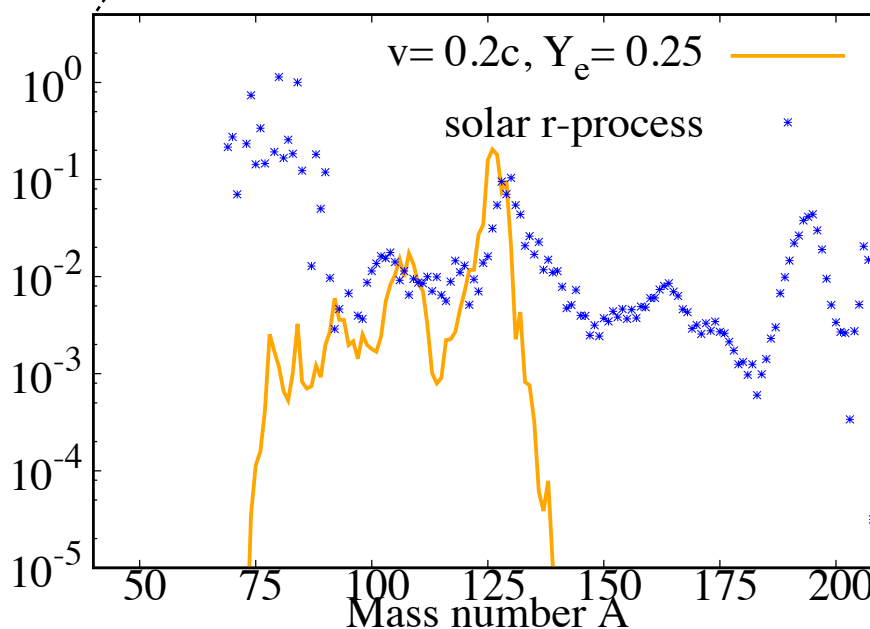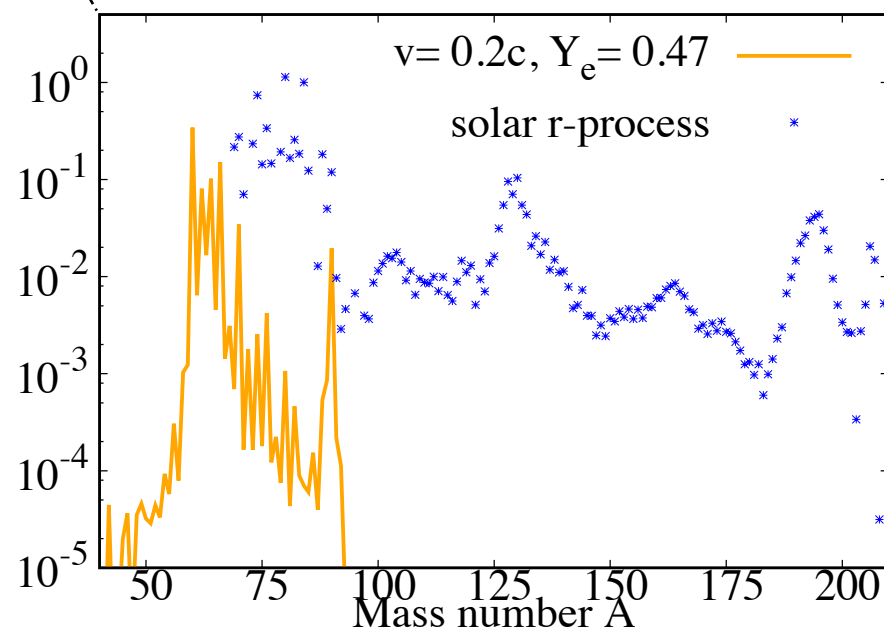

Supplement: slz007_supplemental_file.zip [file slz007_supplemental_file.zip]
